# Supplementary figures and images for: An improved chemical model for the quantitative description of the front propagation in the tetrathionate–chlorite reaction
Source: Royal Society of Chemistry journal article supplement (doi:10.1039/b920618c), 2010-01-01

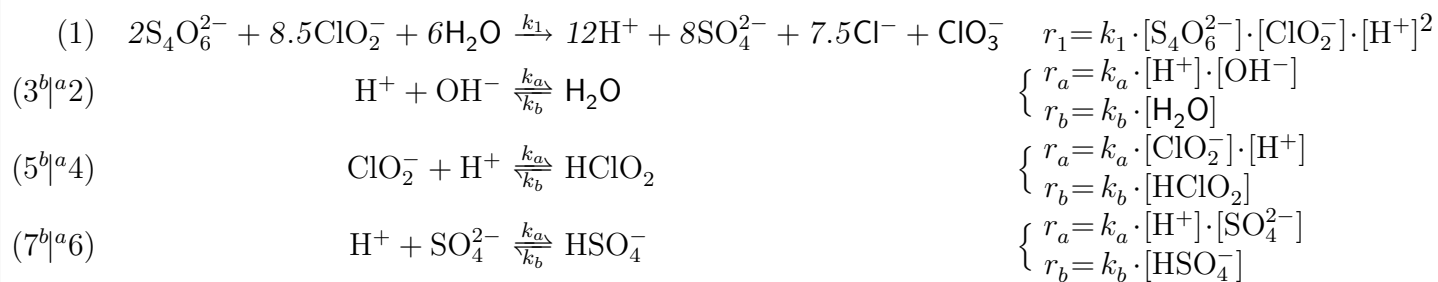

### Species in TEK08.ODE

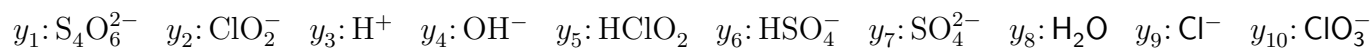

Supplement: b920618c.zip [file b920618c.zip]

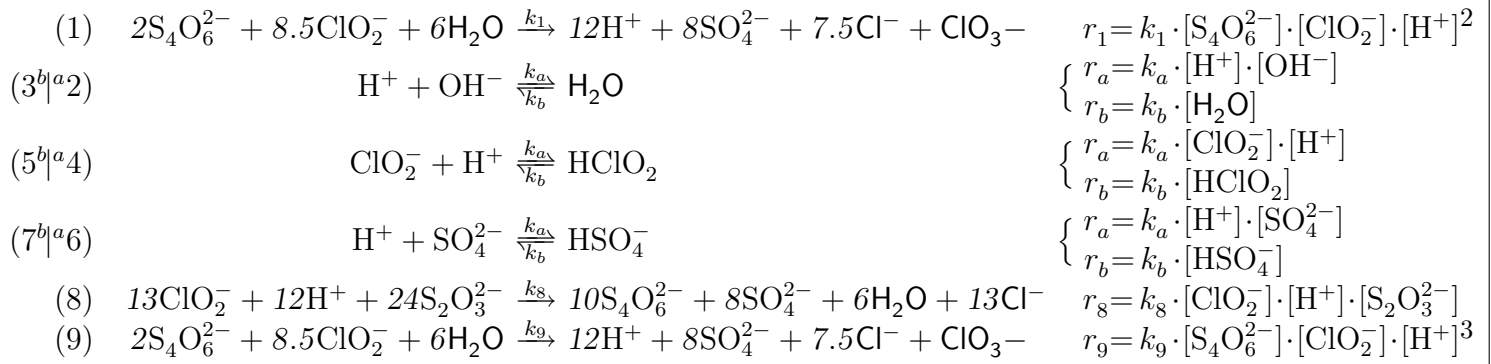

### Species in TEK011.ODE

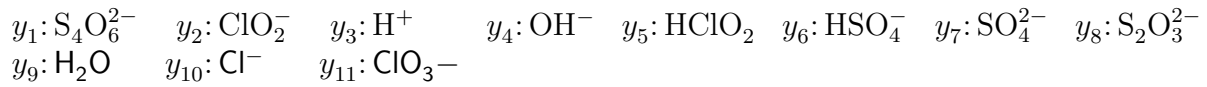

Supplement: b920618c.zip [file b920618c.zip]

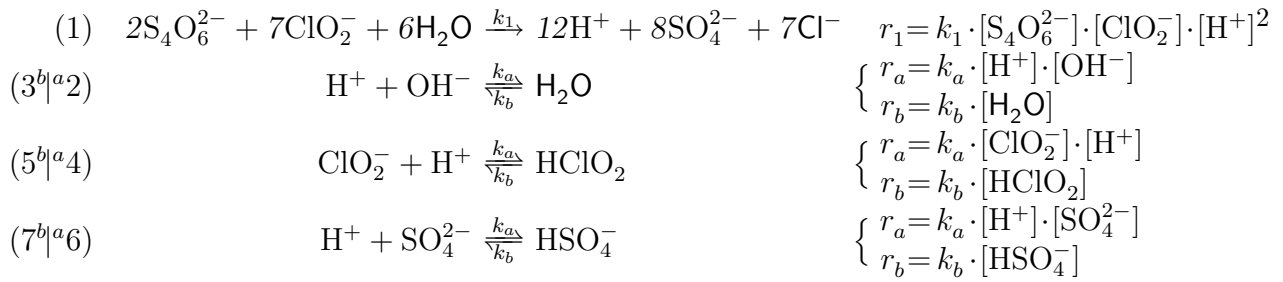

### Species in TEK04.ODE

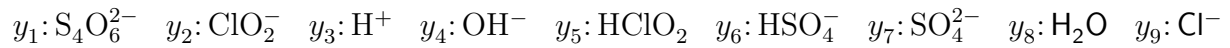

Supplement: b920618c.zip [file b920618c.zip]

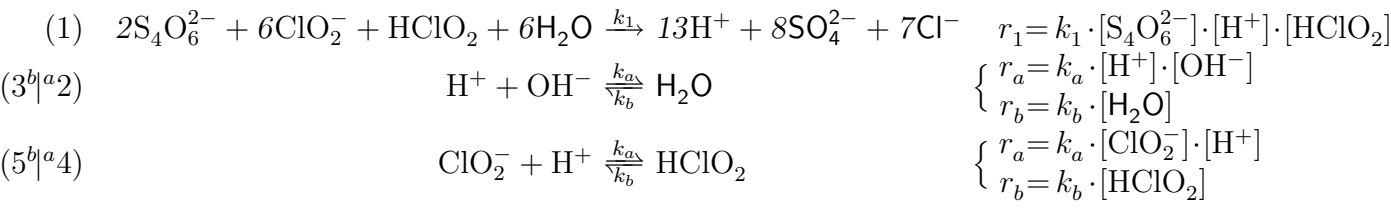

Species in TEK03.ODE

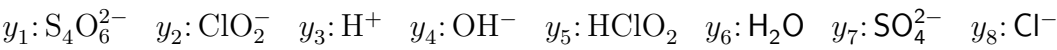

Supplement: b920618c.zip [file b920618c.zip]

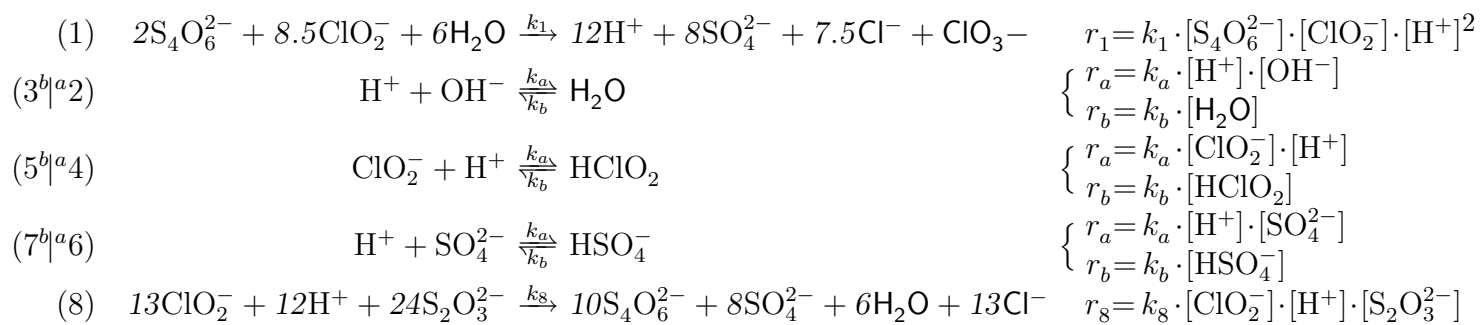

### Species in TEK09.ODE

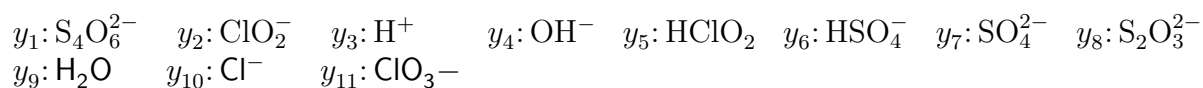

Supplement: b920618c.zip [file b920618c.zip]

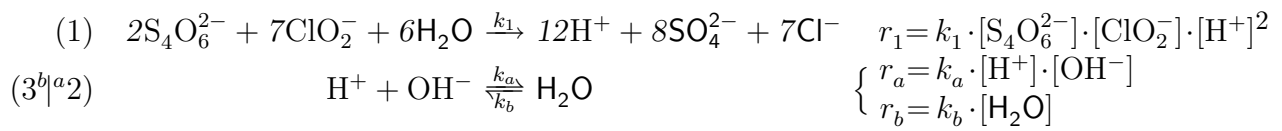

### Species in TEK01.ODE

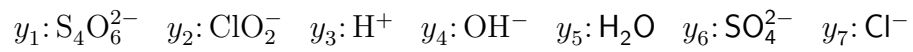

Supplement: b920618c.zip [file b920618c.zip]
